# Supplementary figures and images for: Clinical implementation of PLANET®Dose for dosimetric assessment after [177Lu]Lu-DOTA-TATE: comparison with Dosimetry Toolkit® and OLINDA/EXM® V1.0
Source: Research Square preprint supplement (doi:10.21203/rs.3.rs-36998/v4), 2020-11-18

**Table 2:**


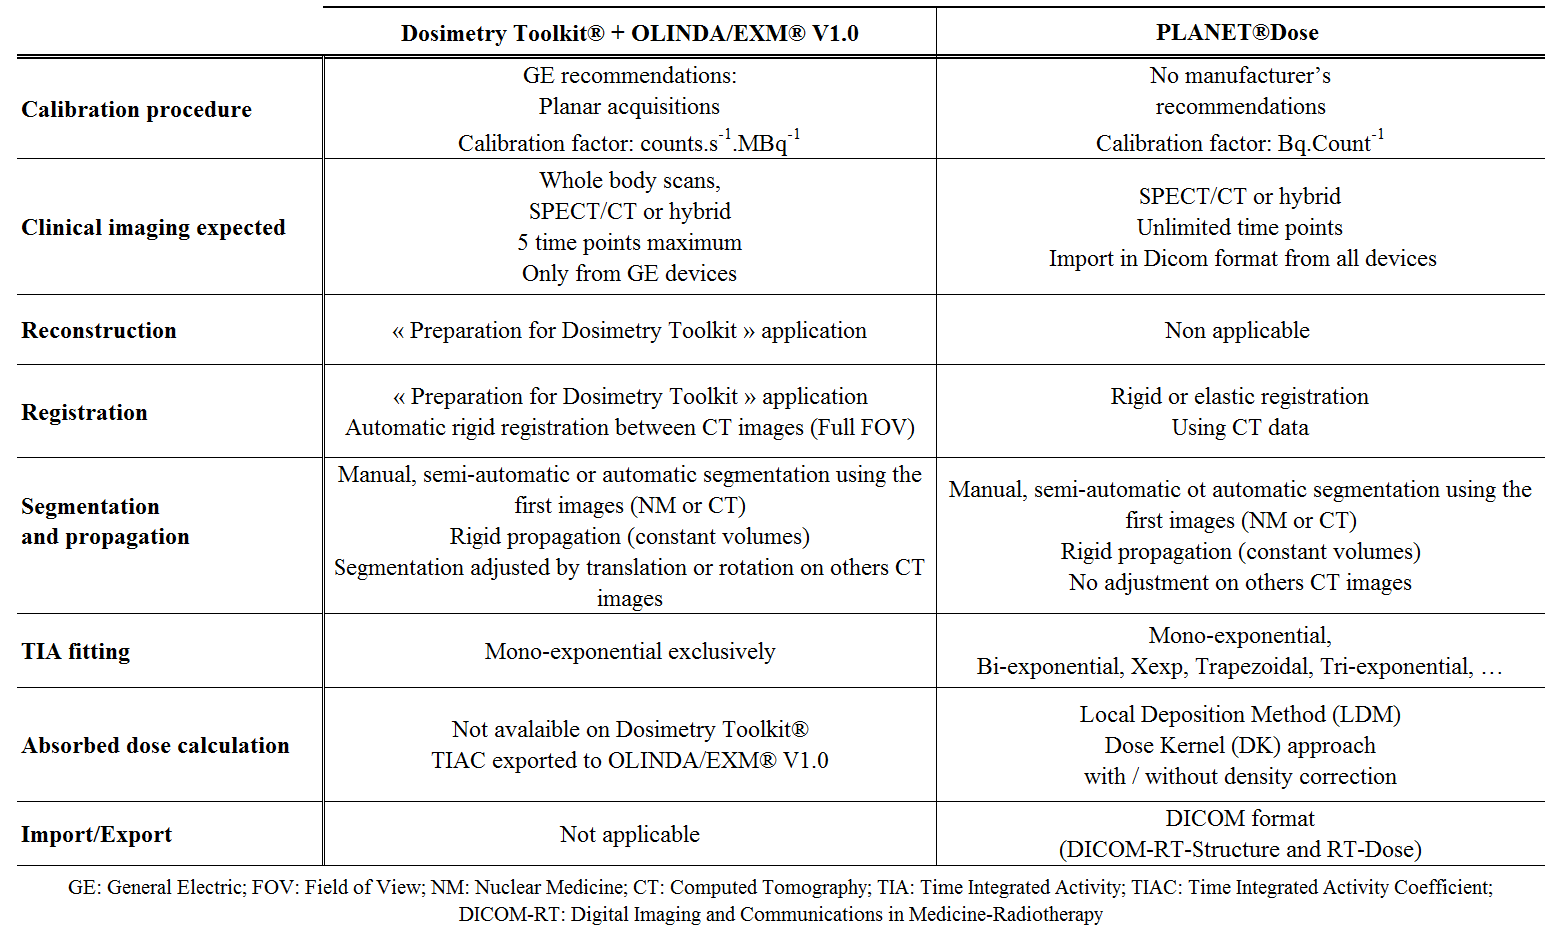

Supplement: Supplementary file 1 [file 967fba0ff2ac4e6ef5b93953.docx]
